# Supplementary material
Source: Copernicus journal article supplement (doi:10.5194/acp-26-5333-2026)
Supplement: Supplementary file 1 [file acp-26-5333-2026-supplement.pdf]

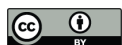

*Supplement of*

## **Isotopic apportionment of sulfate aerosols between natural and anthropogenic sources in the outflow of South Asia**

**Sean Clarke et al.**

*Correspondence to:* Sean Clarke ([sean.clarke@aces.su.se](mailto:sean.clarke@aces.su.se)) and Örjan Gustafsson ([orjan.gustafsson@aces.su.se](mailto:orjan.gustafsson@aces.su.se))

The copyright of individual parts of the supplement might differ from the article licence.

1

2 **S1: Mass-spectrometer settings for  $\delta^{34}\text{S}$ .**

**Instrument Settings**

Mass spectrometer

Nu Plasma (II) MC-ICP-MS

Introduction

Aridus II

PFA nebulizer,  $\sim 100 \mu\text{L min}^{-1}$  uptake rate

Nebulizer gas

37 psi

Sweep gas

$5.8 \text{ L min}^{-1}$

Spray Chamber Temperature

$110^\circ\text{C}$

Desolvator Temperature

$160^\circ\text{C}$

Cones

common Ni cones

Torch

glass

Measurement mode

high resolution (slit width:  $25\mu\text{m}$ , resolving power  $\sim 10000$ )

standard-sample bracketing (IAEA-S-1,  $\delta^{34}\text{S} = -0.30\% \text{ VCDT}$ )

sample consumption per single analysis:  $\sim 500 \mu\text{L}$

36 cycles, 6 seconds integration time/cycle

washout time: 70 sec

transfer time: 90 sec

Sensitivity ( $m/z = 28$ )

$\sim 1.5\text{-}4 \text{ V/ppm}$  samples and standards measured at 1.3-3 ppm Sulfur +

2.6-6 ppm Sodium (S:Na = 0.5) in 0.3 M  $\text{HNO}_3$

15 mV ( $\sim 0.2 - 0.5\%$  of sample intensity)

on-mass-zero measured for 60 sec in 0.3 M  $\text{HNO}_3$  at the beginning of each run

Blanks ( $m/z = 28$ )

Background

**External reproducibility**

The S isotopes on the Nu Plasma II coupled with the Aridus II (Vegacenter, NRM) based on repeated analyses ( $n = 20$ )

on the reference solution IAEA-S-4

$\delta^{34}\text{S}$  : **0.31** ( $2\sigma$ )

$\delta^{34}\text{S}$  : **0.74** ( $2\sigma$ )

### 3 **S2: Natural and anthropogenic Sources of Sulfate and Isotopic Attribution Uncertainty**

4 Natural sulfate has multiple sources, including crustal, volcanic, biogenic (both terrestrial and marine), and  
5 biomass burning emissions. Volcanic emissions can be considered minor in South Asia as there is only one  
6 volcano in the region, at Barren Island (12.3° N, 93.9° E), but global outgassing could lead to a potential input  
7 (Jongeblod, Schauer, Cole-Dai, et al., 2023; Rastogi et al., 2020).

8 Terrestrial biogenic sources have received relatively little attention, but environments such as wetlands may  
9 emit significant amounts of sulfate. The isotopic composition of terrestrial biogenic sulfate overlaps with the  
10 depleted anthropogenic signature identified in this study, making it difficult to distinguish without additional  
11 analyses.

12 The ship end-member is thought to be primarily from the combustion of heavy fuel oil (HFO), with this study  
13 using a value of  $3 \pm 3 \text{ ‰}$  (Seguin et al., 2010, 2011; Wadleigh, 2004). This end-member was applied for  
14 measurements in the North Atlantic, where conditions are similar to those experienced at MCOH in summer.  
15 The  $^{34}\text{S}$  end-member of heavy fuel oil (HFO) used by large ships can be quite depleted, with blended HFOs for  
16 East Asia averaging around  $0 \pm 4 \text{ ‰}$  (Maruyama et al., 2000). To arrive at the end-member used in this study, an  
17 enrichment during oxidation from sulfur dioxide to sulfate of about 3 ‰ would need to happen. This is  
18 consistent with measured enrichment factors at urban sites in East Asia but lower than those derived from  
19 laboratory studies (Harris et al., 2013; Lee et al., 2023). Methanesulfonic acid (MSA) is not separated through  
20 the anion-retaining mesh and may in principle therefore influence measured  $\delta^{34}\text{S}(\text{SO}_4^{2-})$ . Methanesulfonic acid  
21 (MSA) has been reported to have  $\delta^{34}\text{S} = 17.4 \pm 0.7 \text{ ‰}$  (Sanusi et al., 2006). In the Indian Ocean region, MSA  
22 concentrations are typically  $\sim 30\text{--}60 \text{ ng m}^{-3}$  (Aswini et al., 2020), which are small relative to sulfate ( $\sim 1\text{--}16 \text{ }\mu\text{g}$   
23  $\text{m}^{-3}$  reported in this study). Using a simple mass-balance estimate,  $\Delta\delta^{34}\text{S}(\text{SO}_4^{2-}) \approx f_{\text{MSA}}(\delta_{\text{MSA}} - \delta_{\text{SO}_4})$ ,  
24 the expected influence of any MSA carryover is  $\leq \sim 0.1\text{--}0.2 \text{ ‰}$  for typical  $f_{\text{MSA}} \lesssim 1\%$ , and therefore negligible  
25 relative to analytical uncertainty.

26

### 27 **S3: Error propagation**

28 This approach considers uncertainties in the variables; the first method only captures the deviation among  
29 samples and not the end-member uncertainties.

$$30 \quad (\sigma_x^2 + \sigma_{\text{marine}}^2)^{0.5} / (\sigma_{\text{anthro}}^2 + \sigma_{\text{marine}}^2)^{0.5} \quad (\text{S1})$$

$$31 \quad \sigma_a \quad \sigma_b$$

$$32 \quad \frac{\sigma_x}{x} = \left( \left( \frac{\sigma_a}{a} \right)^2 + \left( \frac{\sigma_b}{b} \right)^2 \right)^{0.5} \quad (\text{S2})$$

33

### 34 **S4: Sensitivity analysis of non-anthropogenic inputs to the continental end-member**

35 The source-derived “anthropogenic” end-member assumes that sulfate collected at the receptor site represents  
36 predominantly anthropogenic sulfate. In practice, this end-member may also include some contributions of  
37  $\text{SO}_4^{2-}$  from source categories not explicitly treated in the main mixing model (e.g., biomass burning or

38 metallurgical emissions). For the IGP/Delhi region, biomass burning has been estimated at  $2 \pm 2\%$  (Dasari &  
39 Widory, 2024). This partly motivated our use of the term ‘anthropogenic end-member’ rather than a ‘fossil-fuel  
40 end-member’.

41 For non-anthropogenic sources Dasari & Widory, (2024) estimated a road-dust contribution of  $4 \pm 3\%$  for the  
42 IGP/Delhi region (based on  $PM_{10}$ ), which is likely an upper bound relative to our  $PM_{2.5}$  dataset. The road-dust  
43  $\delta^{34}S$  value used in that study ( $2 \pm 1\%$ ; Sawlani et al., 2019) is consistent with resuspended, pollution-derived  
44 sulfate rather than purely mineral sulfate, which is typically higher ( $\sim +7.4\%$  for gypsum-derived sulfate; Olson  
45 et al., 2021).

46 To test the sensitivity of our conclusions to potential non-anthropogenic sulfate in the anthropogenic end-  
47 member, we performed a dilution/sensitivity analysis in which 5% and 10% of the anthropogenic end-member  
48 are replaced by “other” sulfate spanning a wide range of  $\delta^{34}S$  values (DMS-derived, volcanic, terrestrial  
49 biogenic, and mineral dust sulfate; Table S2). The most extreme case assigns the full 10% “other” fraction to  
50 DMS-derived sulfate ( $\delta^{34}S = +18.8\%$ ), which is unlikely for aerosols originating from Delhi but provides an  
51 extreme upper bound on the potential effect. Across scenarios, the maximum change in inferred anthropogenic  
52 contribution is  $\sim 9$  percentage points, comparable to our overall model uncertainty; therefore, our main  
53 conclusions are robust.

54

#### 55 **S5: Keeling-plot approach for determining the anthropogenic end-member**

56 A Keeling plot analysis ( $1/nssSO_4^{2-}$  vs.  $\delta^{34}S(nssSO_4^{2-})$ , Fig. S1) gave an intercept of  $2.50 \pm 0.36\%$  ( $1\sigma$ ), similar  
57 to our anthropogenic endmember (Fig. 1, Table. S2). However, because the intercept is sensitive to sample  
58 selection (e.g., excluding summer samples yields  $1.2 \pm 0.64\%$ ), we do not use the Keeling approach here due to  
59 concerns that mixed and variable sources violate its assumptions for aerosol sulfate (Jongebloed, Schauer,  
60 Hattori, et al., 2023).

61

62

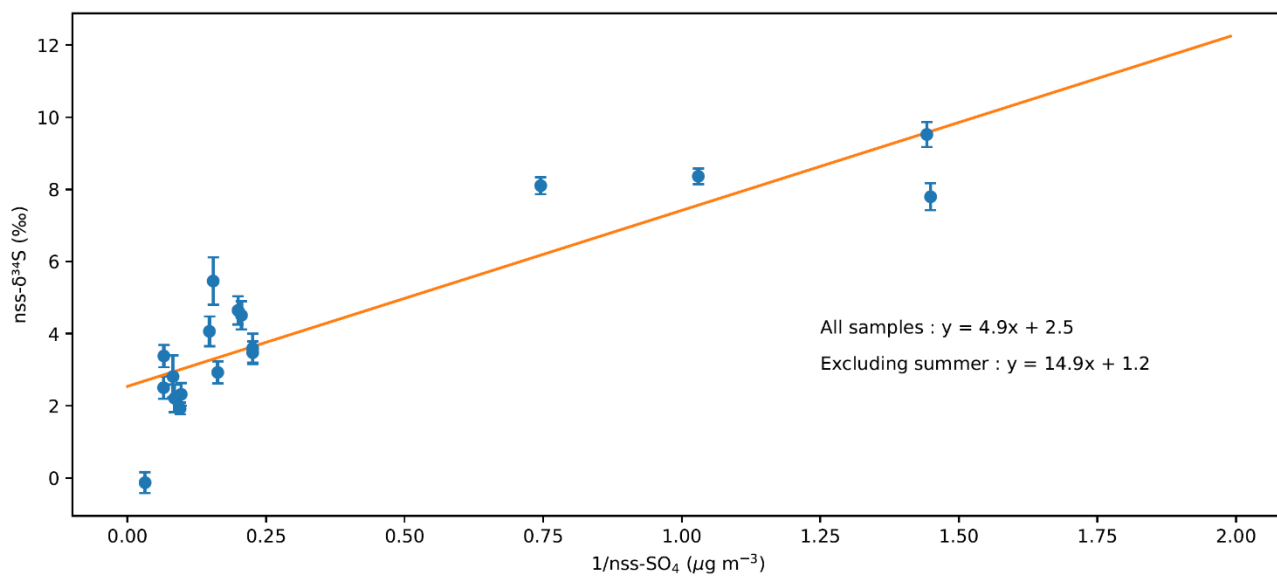

63 **Fig. S1:** Keeling plot which shows the ( $1/nssSO_4^{2-}$  vs.  $\delta^{34}S(nssSO_4^{2-})$ ). The y-intercept represents the expected anthropogenic  
 64 end-member. Blue points denote the  $nss-\delta^{34}S$  from this study, and the orange line denotes the linear best fit.

65

66

67

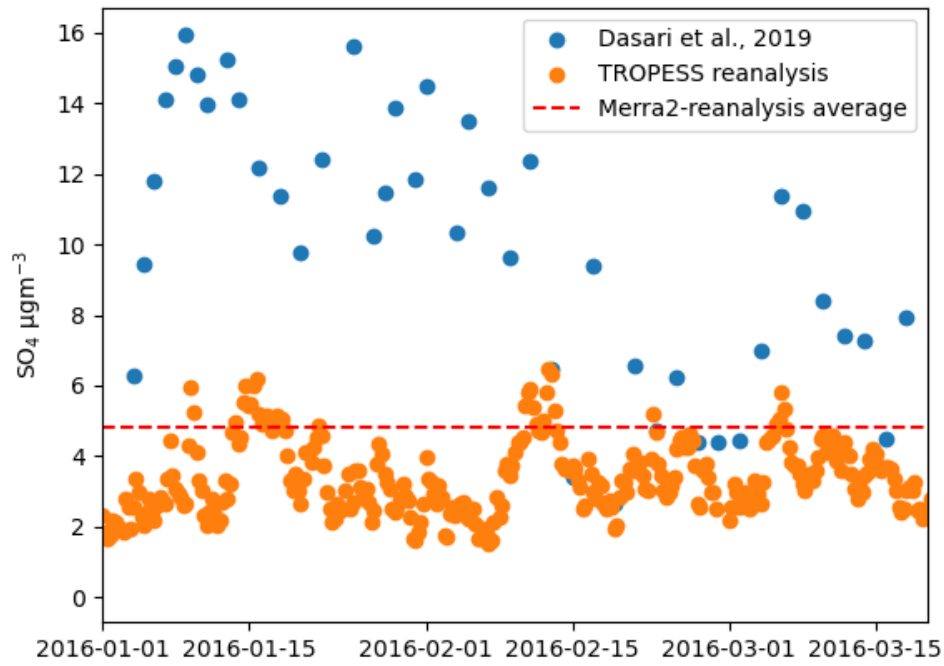

80 **Fig. S2:** Comparison between in situ measurements (SAPOEX-16; Dasari et al., 2019) and reanalysis/satellite products  
 81 (TROPES; MERRA-2; Buchard et al., 2017; Gelaro et al., 2017; Miyazaki, 2024; Randles et al., 2017). The spring average  
 82 from TROPES was approximately  $1.5 \mu\text{g m}^{-3}$ , compared to this study's  $4.6 \pm 0.7 \mu\text{g m}^{-3}$  for spring (April).

83

84

85

86

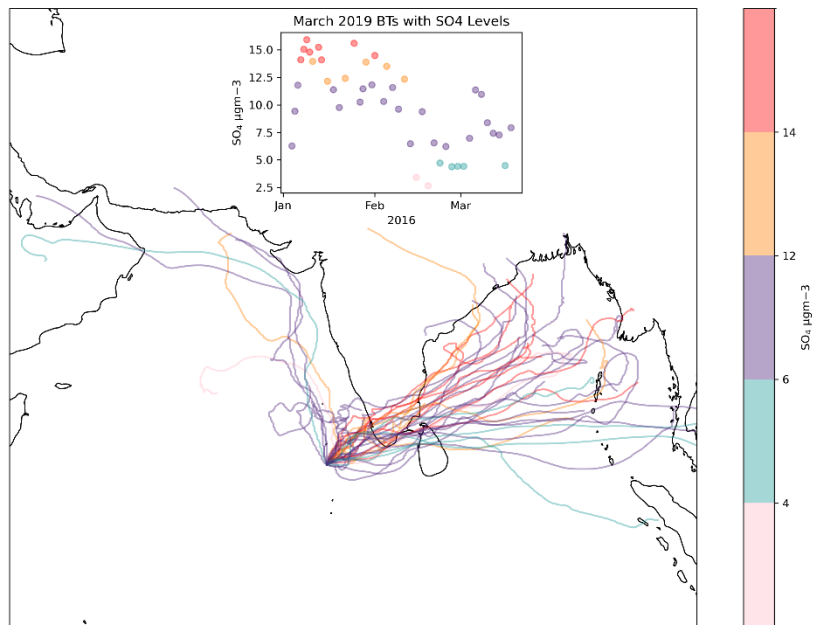

87 **Fig. S3:** Seven-day back trajectories for SAPOEX-16 campaign (January–March, Dasari et al., 2019) with color  
88 corresponding to sulfate concentration.

89

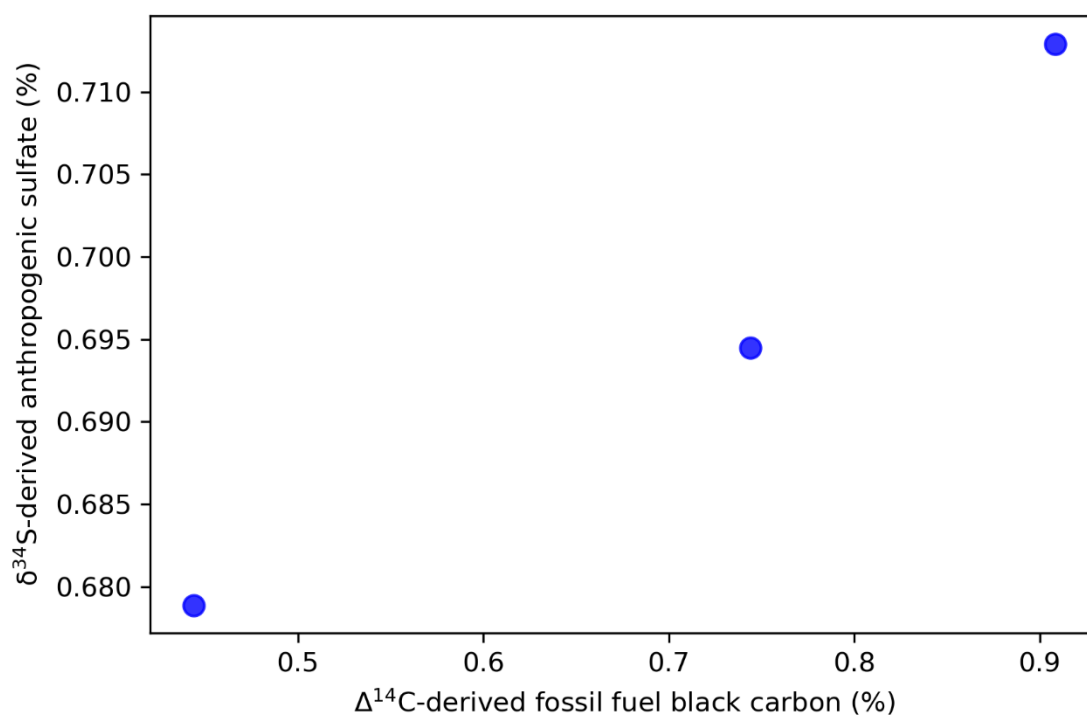

91

92 **Fig. S4:** Fossil fuel BC ( $\Delta^{14}\text{C}$ ) versus anthropogenic sulfate ( $\delta^{34}\text{S}$ ) for the summer samples (2013–2015).

93

94

95

96

97

98

99

100

101

**Table S1:** Samples used to derive the anthropogenic IGP end-member

| Date           | Location | $\delta^{34}\text{S}$ (‰) | Author                |
|----------------|----------|---------------------------|-----------------------|
| 10/02/2016     | Delhi    | 4                         | Sawhani et al., 2019  |
| 10/05/2016     | Delhi    | 4.5                       | Sawhani et al., 2019  |
| 10/08/2016     | Delhi    | 6                         | Sawhani et al., 2019  |
| 10/12/2016     | Delhi    | 5.5                       | Sawhani et al., 2019  |
| 10/15/2016     | Delhi    | 5.6                       | Sawhani et al., 2019  |
| 10/18/2016     | Delhi    | 3.5                       | Sawhani et al., 2019  |
| 10/24/2016     | Delhi    | 4.6                       | Sawhani et al., 2019  |
| 10/26/2016     | Delhi    | 3                         | Sawhani et al., 2019  |
| 10/27/2016     | Delhi    | 2.5                       | Sawhani et al., 2019  |
| 10/28/2016     | Delhi    | 2.6                       | Sawhani et al., 2019  |
| 10/29/2016 (D) | Delhi    | 2.8                       | Sawhani et al., 2019  |
| 10/29/2016 (N) | Delhi    | 1.2                       | Sawhani et al., 2019  |
| 10/30/2016 (D) | Delhi    | 1.5                       | Sawhani et al., 2019  |
| 10/30/2016 (N) | Delhi    | -1.3                      | Sawhani et al., 2019  |
| 10/31/2016 (D) | Delhi    | 1.7                       | Sawhani et al., 2019  |
| 10/31/2016 (N) | Delhi    | -1                        | Sawhani et al., 2019  |
| 11/01/2016 (D) | Delhi    | 3.2                       | Sawhani et al., 2019  |
| 11/01/2016 (N) | Delhi    | 1.3                       | Sawhani et al., 2019  |
| 11/02/2016 (D) | Delhi    | 1.3                       | Sawhani et al., 2019  |
| 11/02/2016 (N) | Delhi    | -0.4                      | Sawhani et al., 2019  |
| 11/03/2016 (D) | Delhi    | 4.5                       | Sawhani et al., 2019  |
| 11/03/2016 (N) | Delhi    | 4.1                       | Sawhani et al., 2019  |
| 11/04/2016 (D) | Delhi    | 2.3                       | Sawhani et al., 2019  |
| 11/04/2016 (N) | Delhi    | 2                         | Sawhani et al., 2019  |
| 11/05/2016 (D) | Delhi    | -0.8                      | Sawhani et al., 2019  |
| 11/05/2016 (N) | Delhi    | -0.2                      | Sawhani et al., 2019  |
| 11/06/2016 (D) | Delhi    | -0.7                      | Sawhani et al., 2019  |
| 11/06/2016 (N) | Delhi    | -1                        | Sawhani et al., 2019  |
| 11/07/2016 (D) | Delhi    | 4                         | Sawhani et al., 2019  |
| 11/07/2016     | Delhi    | 0.6                       | Sawhani et al., 2019  |
| 05/04/2021     | Delhi    | 4.71                      | Dasari & Widory, 2024 |
| 10/04/2021     | Delhi    | 3.41                      | Dasari & Widory, 2024 |
| 14/04/2021     | Delhi    | 1.52                      | Dasari & Widory, 2024 |
| 18/04/2021     | Delhi    | 0.67                      | Dasari & Widory, 2024 |
| 23/04/2021     | Delhi    | 1.95                      | Dasari & Widory, 2024 |
| 01/05/2021     | Delhi    | 3.4                       | Dasari & Widory, 2024 |
| 04/05/2021     | Delhi    | 2.4                       | Dasari & Widory, 2024 |
| 07/05/2021     | Delhi    | 1.34                      | Dasari & Widory, 2024 |
| 09/05/2021     | Delhi    | 1.38                      | Dasari & Widory, 2024 |
| 10/05/2021     | Delhi    | 1.55                      | Dasari & Widory, 2024 |
| 14/05/2021     | Delhi    | 2.16                      | Dasari & Widory, 2024 |
| 22/05/2021     | Delhi    | 1.72                      | Dasari & Widory, 2024 |
| 25/05/2021     | Delhi    | 0.73                      | Dasari & Widory, 2024 |
| 30/05/2021     | Delhi    | 2.8                       | Dasari & Widory, 2024 |
| 31/05/2021     | Delhi    | 0.69                      | Dasari & Widory, 2024 |

|                             |       |       |            |
|-----------------------------|-------|-------|------------|
| Batch 116; 16/01/2016       | BCOB  | 2.83  | This study |
| Batch 117; 17/01/2016       | BCOB  | 2.52  | This study |
| Batch 118; 19/01/2016       | BCOB  | 2.4   | This study |
| DEL_SPX-16_24hrs_25JAN_2016 | Delhi | -0.07 | This study |
| DEL_SPX-16_night_27FEB_2016 | Delhi | 1.98  | This study |

103

104

| Non anthropogenic contribution                 | 100% Anthropogenic;<br>0% Other |                          | 95% Anthropogenic;<br>5% Other |                          | 90% Anthropogenic;<br>10% Other |                          |
|------------------------------------------------|---------------------------------|--------------------------|--------------------------------|--------------------------|---------------------------------|--------------------------|
|                                                | Season                          | Percentage anthropogenic | Season                         | Percentage anthropogenic | Season                          | Percentage anthropogenic |
| <b>DMS (+18.8 ‰)<sup>a</sup></b>               | Winter                          | 94                       | Winter                         | 89                       | Winter                          | 85                       |
|                                                | Spring                          | 87                       | Spring                         | 83                       | Spring                          | 79                       |
|                                                | Summer                          | 65                       | Summer                         | 61.7                     | Summer                          | 59                       |
| <b>Volcanic (+4.1 ‰)<sup>b</sup></b>           | Winter                          | 94                       | Winter                         | 93                       | Winter                          | 93                       |
|                                                | Spring                          | 87                       | Spring                         | 87                       | Spring                          | 86                       |
|                                                | Summer                          | 65                       | Summer                         | 65                       | Summer                          | 65                       |
| <b>Terrestrial biogenic (−5 ‰)<sup>c</sup></b> | Winter                          | 94                       | Winter                         | 96                       | Winter                          | 99                       |
|                                                | Spring                          | 87                       | Spring                         | 89                       | Spring                          | 92                       |
|                                                | Summer                          | 65                       | Summer                         | 67                       | Summer                          | 69                       |
| <b>Soil dust (+7.4 ‰)<sup>d</sup></b>          | Winter                          | 94                       | Winter                         | 93                       | Winter                          | 91                       |
|                                                | Spring                          | 87                       | Spring                         | 86                       | Spring                          | 84                       |
|                                                | Summer                          | 65                       | Summer                         | 64                       | Summer                          | 63                       |

106 a = (Amrani et al., 2013); b = (Jongbloed, Schauer, Cole-Dai, et al., 2023); c = (Kamyshny et al., 2014); d = Olson et al., 2021 . Note:  
107 Kamyshny et al. (2014) reports a broad range of possible values. For the purposes of this sensitivity test, −5 ‰ was selected as a rough  
108 approximation of the mean. The full range of isotopic compositions is large and lies outside the scope of this paper.

109

110

111 **References**

112 Amrani, A., Said-Ahmad, W., Shaked, Y., & Kiene, R. P. (2013). Sulfur isotope homogeneity of  
113 oceanic DMSP and DMS. *Proceedings of the National Academy of Sciences of the United States*  
114 *of America*, 110(46). <https://doi.org/10.1073/pnas.1312956110>

115 Aswini, A. R., Hegde, P., Aryasree, S., Girach, I. A., & Nair, P. R. (2020). Continental outflow of  
116 anthropogenic aerosols over Arabian Sea and Indian Ocean during wintertime: ICARB-2018  
117 campaign. *Science of the Total Environment*, 712.  
118 <https://doi.org/10.1016/j.scitotenv.2019.135214>

119 Buchard, V., Randles, C. A., da Silva, A. M., Darmenov, A., Colarco, P. R., Govindaraju, R., Ferrare,  
120 R., Hair, J., Beyersdorf, A. J., Ziemba, L. D., & Yu, H. (2017). The MERRA-2 aerosol  
121 reanalysis, 1980 onward. Part II: Evaluation and case studies. *Journal of Climate*, 30(17).  
122 <https://doi.org/10.1175/JCLI-D-16-0613.1>

123 Dasari, S., Andersson, A., Bikkina, S., Holmstrand, H., Budhavant, K., Satheesh, S., Asmi, E., Kesti,  
124 J., Backman, J., Salam, A., Bisht, D. S., Tiwari, S., Hameed, Z., & Gustafsson, Ö. (2019).  
125 Photochemical degradation affects the light absorption of water-soluble brown carbon in the  
126 South Asian outflow. *Science Advances*, 5(1). <https://doi.org/10.1126/sciadv.aau8066>

127 Dasari, S., & Widory, D. (2024). Retrospective Isotopic Analysis of Summertime Urban Atmospheric  
128 Sulfate in South Asia Using Improved Source Constraints. *ACS ES&T Air*, 1(5), 357–364.  
129 <https://doi.org/10.1021/acsestair.3c00060>

130 Gelaro, R., McCarty, W., Suárez, M. J., Todling, R., Molod, A., Takacs, L., Randles, C. A.,  
131 Darmenov, A., Bosilovich, M. G., Reichle, R., Wargan, K., Coy, L., Cullather, R., Draper, C.,  
132 Akella, S., Buchard, V., Conaty, A., da Silva, A. M., Gu, W., ... Zhao, B. (2017). The modern-  
133 era retrospective analysis for research and applications, version 2 (MERRA-2). *Journal of*  
134 *Climate*, 30(14). <https://doi.org/10.1175/JCLI-D-16-0758.1>

135 Harris, E., Sinha, B., Van Pinxteren, D., Tilgner, A., Fomba, K. W., Schneider, J., Roth, A., Gnauk,  
136 T., Fahlbusch, B., Mertes, S., Lee, T., Collett, J., Foley, S., Borrmann, S., Hoppe, P., &  
137 Herrmann, H. (2013). Enhanced role of transition metal ion catalysis during in-cloud oxidation  
138 of SO<sub>2</sub>. *Science*, 340(6133). <https://doi.org/10.1126/science.1230911>

139 Jongebloed, U. A., Schauer, A. J., Cole-Dai, J., Larrick, C. G., Wood, R., Fischer, T. P., Carn, S. A.,  
140 Salimi, S., Edouard, S. R., Zhai, S., Geng, L., & Alexander, B. (2023). Underestimated Passive  
141 Volcanic Sulfur Degassing Implies Overestimated Anthropogenic Aerosol Forcing. *Geophysical*  
142 *Research Letters*, 50(1). <https://doi.org/10.1029/2022GL102061>

143 Jongebloed, U. A., Schauer, A. J., Hattori, S., Cole-Dai, J., Larrick, C. G., Salimi, S., Edouard, S. R.,  
144 Geng, L., & Alexander, B. (2023). Sulfur isotopes quantify the impact of anthropogenic  
145 activities on industrial-era Arctic sulfate in a Greenland ice core. *Environmental Research*  
146 *Letters*, 18(7). <https://doi.org/10.1088/1748-9326/acdc3d>

147 Kamysny, A., Druschel, G., Mansaray, Z. F., & Farquhar, J. (2014). Multiple sulfur isotopes  
148 fractionations associated with abiotic sulfur transformations in Yellowstone National Park  
149 geothermal springs. *Geochemical Transactions*, 15(1). <https://doi.org/10.1186/1467-4866-15-7>

150 Lee, G., Ahn, J., Park, S. M., Moon, J., Park, R., Sim, M. S., Choi, H., Park, J., & Ahn, J. Y. (2023).  
151 Sulfur isotope-based source apportionment and control mechanisms of PM<sub>2.5</sub> sulfate in Seoul,  
152 South Korea during winter and early spring (2017–2020). *Science of the Total Environment*,  
153 905. <https://doi.org/10.1016/j.scitotenv.2023.167112>

- 154 Maruyama, T., Ohizumi, T., Taneoka, Y., Minami, N., Fukuzaki, N., Murai, H., Murano, K., &  
155 Kusakabe, M. (2000). Sulfur isotope ratios of coals and oils used in China and Japan. *Nippon*  
156 *Kagaku Kaishi / Chemical Society of Japan - Chemistry and Industrial Chemistry Journal*,  
157 2000(1). <https://doi.org/10.1246/nikkashi.2000.45>
- 158 Miyazaki, K. (2024). *TROPESS Chemical Reanalysis Aerosol SO4 6-Hourly 3-Dimensional Product*  
159 *VI*. <https://doi.org/10.5067/TWDAYANXT8UM>
- 160 Olson, E., Michalski, G., Welp, L., Larrea Valdivia, A. E., Reyes Larico, J., Salcedo Peña, J., Fang,  
161 H., Magara Gomez, K., & Li, J. (2021). Mineral dust and fossil fuel combustion dominate  
162 sources of aerosol sulfate in urban Peru identified by sulfur stable isotopes and water-soluble  
163 ions. *Atmospheric Environment*, 260. <https://doi.org/10.1016/j.atmosenv.2021.118482>
- 164 Pataki, D. E., Ehleringer, J. R., Flanagan, L. B., Yakir, D., Bowling, D. R., Still, C. J., Buchmann, N.,  
165 Kaplan, J. O., & Berry, J. A. (2003). The application and interpretation of Keeling plots in  
166 terrestrial carbon cycle research. *Global Biogeochemical Cycles*, 17(1).  
167 <https://doi.org/10.1029/2001GB001850>
- 168 Randles, C. A., da Silva, A. M., Buchard, V., Colarco, P. R., Darmenov, A., Govindaraju, R.,  
169 Smirnov, A., Holben, B., Ferrare, R., Hair, J., Shinozuka, Y., & Flynn, C. J. (2017). The  
170 MERRA-2 aerosol reanalysis, 1980 onward. Part I: System description and data assimilation  
171 evaluation. *Journal of Climate*, 30(17). <https://doi.org/10.1175/JCLI-D-16-0609.1>
- 172 Rastogi, N., Agnihotri, R., Sawlani, R., Patel, A., Babu, S. S., & Satish, R. (2020). Chemical and  
173 isotopic characteristics of PM10 over the Bay of Bengal: Effects of continental outflow on a  
174 marine environment. *Science of the Total Environment*, 726.  
175 <https://doi.org/10.1016/j.scitotenv.2020.138438>
- 176 Sanusi, A. A., Norman, A. L., Burrige, C., Wadleigh, M., & Tang, W. W. (2006). Determination of  
177 the S isotope composition of methanesulfonic acid. *Analytical Chemistry*, 78(14).  
178 <https://doi.org/10.1021/ac0600048>
- 179 Sawlani, R., Agnihotri, R., Sharma, C., Patra, P. K., Dimri, A. P., Ram, K., & Verma, R. L. (2019).  
180 The severe Delhi SMOG of 2016: A case of delayed crop residue burning, coincident firecracker  
181 emissions, and atypical meteorology. *Atmospheric Pollution Research*, 10(3).  
182 <https://doi.org/10.1016/j.apr.2018.12.015>
- 183 Seguin, A. M., Norman, A. L., Eaton, S., & Wadleigh, M. (2011). Seasonality in size segregated  
184 biogenic, anthropogenic and sea salt sulfate aerosols over the North Atlantic. *Atmospheric*  
185 *Environment*, 45(38). <https://doi.org/10.1016/j.atmosenv.2011.09.033>
- 186 Seguin, A. M., Norman, A. L., Eaton, S., Wadleigh, M., & Sharma, S. (2010). Elevated biogenic  
187 sulphur dioxide concentrations over the North Atlantic. *Atmospheric Environment*, 44(9), 1139–  
188 1144. <https://doi.org/10.1016/j.atmosenv.2010.01.005>
- 189 Wadleigh, M. A. (2004). Sulphur isotopic composition of aerosols over the western North Atlantic  
190 Ocean. *Canadian Journal of Fisheries and Aquatic Sciences*, 61(5). <https://doi.org/10.1139/F04-073>

192

193

194
